# runBioSimulations: an extensible web application that simulates a wide range of computational modeling frameworks, algorithms, and formats

Bilal Shaikh<sup>1</sup>, Gnaneswara Marupilla<sup>2</sup>, Mike Wilson<sup>2</sup>, Michael L. Blinov<sup>2</sup>, Ion I. Moraru<sup>2,\*</sup> and Jonathan R. Karr<sup>1,\*</sup>

<sup>1</sup>Icahn Institute for Data Science and Department of Genetics and Genomic Sciences, Icahn School of Medicine at Mount Sinai, 1255 5th Avenue, Suite C2, New York, NY 10029, USA and <sup>2</sup>Center for Cell Analysis and Modeling, University of Connecticut School of Medicine, 263 Farmington Avenue, Farmington, CT 06030, USA.

## 1 ABSTRACT

2 **Comprehensive, predictive computational models**  
3 **have significant potential for science, bioengineering,**  
4 **and medicine. One promising way to achieve**  
5 **more predictive models is to combine submodels of**  
6 **multiple subsystems. To capture the multiple scales**  
7 **of biology, these submodels will likely require multi-**  
8 **ple modeling frameworks and simulation algorithms.**  
9 **Several community resources are already available**  
10 **for working with many of these frameworks and**  
11 **algorithms. However, the variety and sheer number**  
12 **of these resources make it challenging to find and**  
13 **use appropriate tools for each model, especially**  
14 **for novice modelers and experimentalists. To make**  
15 **these resources easier to use, we developed**  
16 **runBioSimulations (<https://run.biosimulations.org>),**  
17 **a single web application for executing a broad range**  
18 **of models. runBioSimulations leverages community**  
19 **resources, including BioSimulators, a new open**  
20 **registry of simulation tools. These resources cur-**  
21 **rently enable runBioSimulations to execute nine**  
22 **frameworks and 44 algorithms, and they make run-**  
23 **BioSimulations extensible to additional frameworks**  
24 **and algorithms. runBioSimulations also provides**  
25 **features for sharing simulations and interactively**  
26 **visualizing their results. We anticipate that runBio-**  
27 **Simulations will foster reproducibility, stimulate col-**  
28 **laboration, and ultimately facilitate the creation of**  
29 **more predictive models.**

## 30 INTRODUCTION

31 More comprehensive and predictive models have significant  
32 potential for biology, bioengineering, and medicine. For  
33 example, models of entire cells could help synthetic biologists  
34 design cells and help physicians personalize medicine (1, 2).  
35 Due to the complexity of biology, building such models  
36 will likely require collaboration among many modelers and  
37 experimentalists. One promising way to harness this diverse

38 expertise is to combine multiple submodels of individual  
39 subsystems, each developed by a small group of experts.

40 To capture the multiple scales relevant to biology at a  
41 practical computational cost, these submodels will likely  
42 require multiple modeling frameworks. For example, a model  
43 of the phenotypic heterogeneity of single cells might need  
44 to capture slow processes, such as transcription, precisely,  
45 while fast processes, such as metabolism, could be captured  
46 coarsely. Numerous frameworks and simulation algorithms  
47 already exist for several scales. For example, stochastic kinetic  
48 simulations can capture the cell-to-cell variability in gene  
49 expression, and flux-balance analysis (FBA) can capture the  
50 distribution of fluxes over metabolic networks.

51 To facilitate collaboration, several model formats have been  
52 created for these frameworks and algorithms. For example, the  
53 BioNetGen Language (BNGL, 3), CellML (4), NeuroML (5),  
54 and the Systems Biology Markup Language (SBML, 6) can  
55 capture kinetic models, and the SBML flux balance constraints  
56 (SBML-fbc; 7) and qualitative modeling (SBML-qual; 8)  
57 packages can capture flux balance and logical models.

58 Furthermore, numerous software tools support these for-  
59 mats. For example, BioNetGen (9), NFSim (10), and Virtual  
60 Cell (VCell; 11) support BNGL; BoolNet (12) and The Cell  
61 Collective (13) support SBML-qual; CBMPy (14), COBRAPy  
62 (15), and The Cell Collective support SBML-fbc; COPASI  
63 (16), JWS Online (17), StochSS (18), tellurium (19), and  
64 VCell (11) support SBML; OpenCOR supports CellML (20);  
65 and Open Source Brain supports NeuroML (21).

66 These resources provide experts rich silos for modeling  
67 individual subsystems. However, this siloing poses obstacles  
68 to composing models of multiple subsystems and scales  
69 into comprehensive models. The effort required to learn the  
70 unique frameworks, algorithms, formats, software tools, and  
71 conventions associated with each silo also impedes collabora-  
72 tion, especially for novice modelers and experimentalists.

73 To help investigators use these resources, we developed  
74 runBioSimulations, an extensible REST API and graphical  
75 web application for executing simulations involving a broad  
76 range of frameworks, algorithms, and model formats. runBio-  
77 Simulations leverages several community resources, including  
78 model formats such as SBML, the Simulation Experiment  
79 Description Language (SED-ML, 22), the COMBINE archive

\*To whom correspondence should be addressed. Tel: +1 212-824-9664 (JRK), +1 860-679-2908 (IIM); Email: [karr@mssm.edu](mailto:karr@mssm.edu), [moraru@uchc.edu](mailto:moraru@uchc.edu)

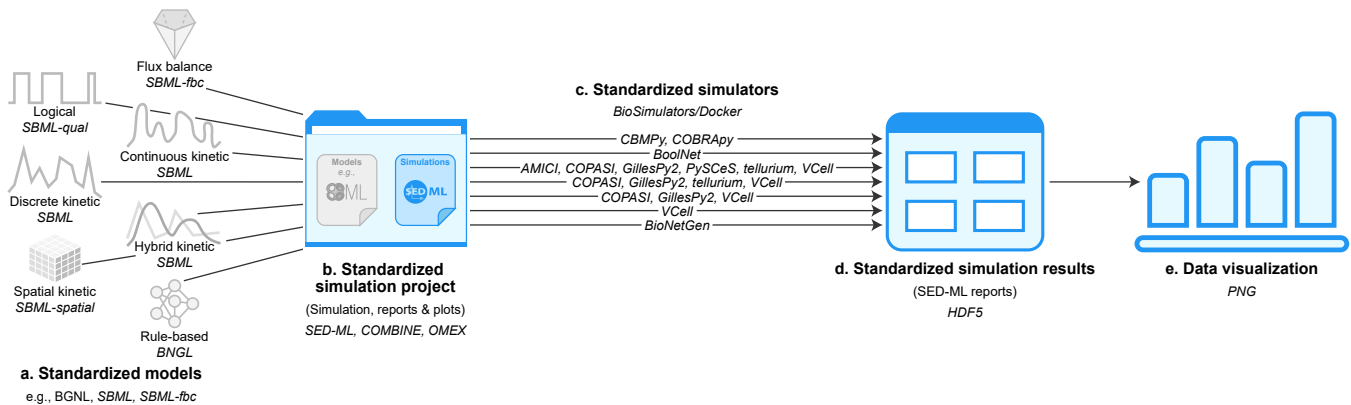

**Figure 1. runBioSimulations is an extensible, standards-driven web application for executing models across a broad range of modeling frameworks, simulation algorithms, and model formats.** runBioSimulations can execute models (a) and simulations (b) described with community resources such as COMBINE, SBML, and SED-ML with standardized simulation tools registered with BioSimulators (c). runBioSimulations produces results in HDF5 format (d). runBioSimulations also provides tools for interactively visualizing simulation results (e).

80 format (23), and BioSimulators (<https://biosimulators.org>),  
81 a new open registry of standardized simulation tools. As  
82 of this writing, runBioSimulations supports nine frame-  
83 works, 44 algorithms, and five model formats (Table S1).  
84 This includes 37 algorithms for continuous, discrete, hybrid,  
85 and rule-based kinetic simulation with BNGL and SBML;  
86 five algorithms for flux balance simulation with SBML-fbc;  
87 and three algorithms for logical simulation with SBML-  
88 qual. Importantly, the community can expand runBioSimu-  
89 lations to additional frameworks, algorithms, and formats  
90 by contributing additional simulation tools to BioSimu-  
91 lators. runBioSimulations also provides features for visualizing  
92 simulation results and debugging, managing, and sharing sim-  
93 ulations. Furthermore, the runBioSimulations API enables the  
94 community to develop additional front-end applications that  
95 utilize runBioSimulations' unique simulation capabilities. For  
96 example, model repositories could use the API to provide  
97 interactive simulations of their models.

98 By making it easier to execute a broad range of mod-  
99 els, we anticipate that runBioSimulations will foster model  
100 reuse, bolster collaboration, and empower peer review. In turn,  
101 we anticipate this will accelerate the development of more  
102 comprehensive and more predictive models.

103 Below, we describe the key features of runBioSimulations,  
104 its architecture, and how it facilitates model reuse and collab-  
105 oration. In addition, we outline our future plans for runBio-  
106 Simulations. The [Supplementary Data](#) summarizes the frame-  
107 works, algorithms, formats, and simulation tools supported  
108 by runBioSimulations; provides additional information about  
109 the implementation of runBioSimulations; presents a case  
110 study of using runBioSimulations to evaluate the practical  
111 reusability of existing published simulations to individual  
112 investigators that illustrates the utility of runBioSimulations;  
113 compares runBioSimulations to other tools; and outlines how  
114 the community can contribute to runBioSimulations.

## 115 KEY FEATURES

116 The key feature of runBioSimulations is the capability to  
117 execute a broad range of simulations that involve a variety  
118 of modeling frameworks, simulation algorithms, and model

119 formats from a single, simple, consistent interface. This  
120 is achieved through a modular architecture that leverages  
121 existing resources including model formats such as SBML,  
122 SED-ML, and the COMBINE archive format to encapsulate  
123 the details of each framework, algorithm, and model for-  
124 mat. This architecture is implemented as a REST API. The  
125 runBioSimulations graphical user interface (GUI) provides  
126 investigators a user-friendly client to this powerful API.

127 The starting point to using runBioSimulations is a  
128 COMBINE archive that contains one or more models in a for-  
129 mat such as BNGL or SBML and describes one or more simu-  
130 lations of these models in SED-ML. Users can obtain models  
131 and simulations encoded in these formats from repositories  
132 such as BioModels (24) or use tools such as VCell to create  
133 models and simulations in these formats. Models and simu-  
134 lations can be packaged into COMBINE archives using tools  
135 such as CombineArchiveWeb (25).

136 The runBioSimulations GUI enables users to execute mod-  
137 els and retrieve and visualize their results in three simple  
138 steps. First, users use the GUI to select a COMBINE  
139 archive to execute and a simulation tool to run the archive  
140 (Figure 2b). Users can choose any of the standardized simu-  
141 lation tools available in the BioSimulators registry and any  
142 of their versions. To help investigators find tools that are  
143 compatible with specific types of models and/or that sup-  
144 port specific simulation algorithms, BioSimulators provides  
145 detailed information about the capabilities of each simula-  
146 tion tool (Figure 2a). The ability to use multiple simulators  
147 has several benefits. (a) This makes it easier to reuse mod-  
148 els, including older models that require legacy formats. (b)  
149 This design makes the simulation logic of runBioSimu-  
150 lations transparent and portable, ensuring users that they can  
151 continue work initiated with runBioSimulations onto their  
152 own computers using the same simulators, further lowering  
153 the barrier to model reuse. (c) Because BioSimulators is an  
154 open registry, this design enables the community to extend the  
155 simulation capabilities of runBioSimulations.

156 Users can manage their simulations and monitor their  
157 progress using a table that summarizes their simulations  
158 (Figure 2g). Optionally, users can also provide an address to

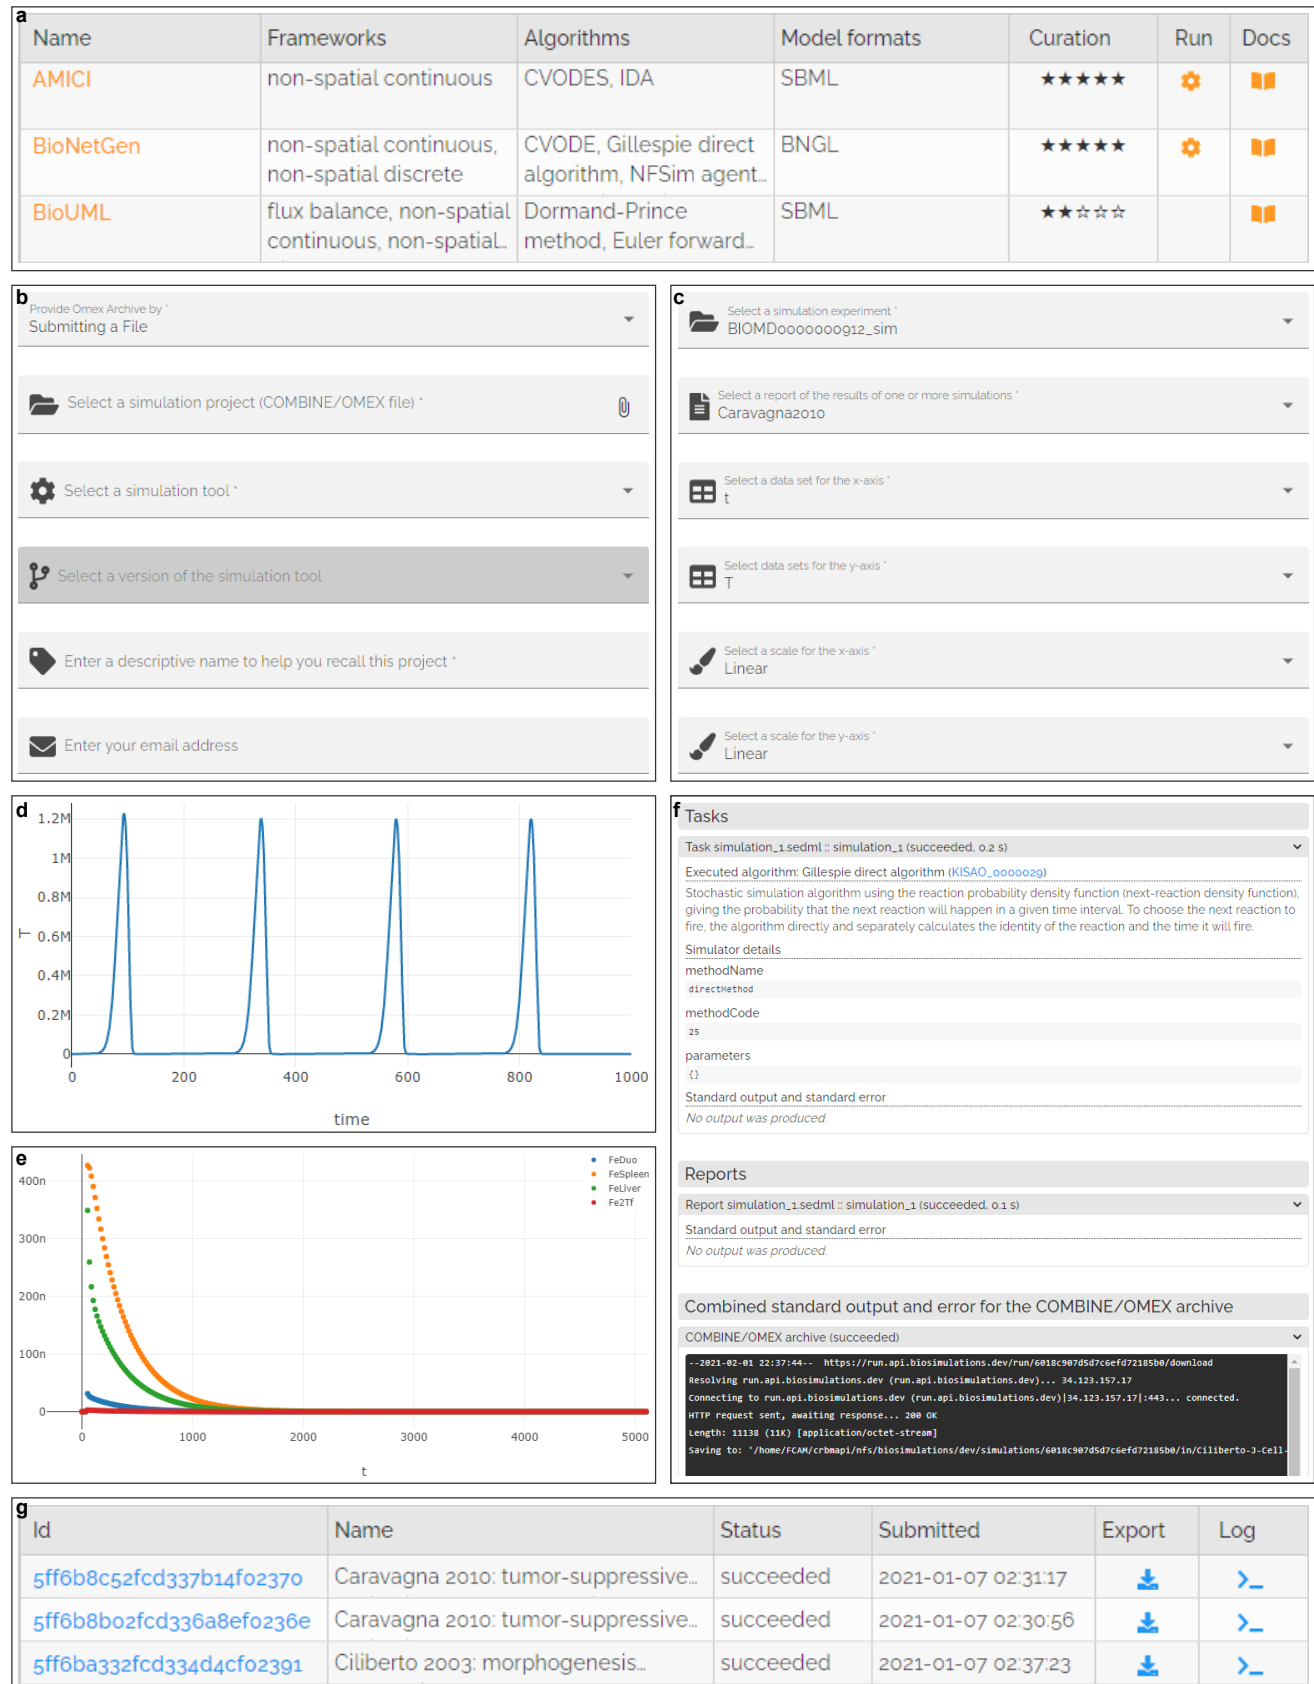

**Figure 2.** runBioSimulations provides a single GUI for executing a broad range of models and visualizing their results. (a) Users can use BioSimulators to select tools for executing specific simulations. (b–e) runBioSimulations provides simple forms for executing simulations and designing visualizations of their results. runBioSimulations also provides a summary table (g) and structured logs (f) for managing and debugging simulations.

159 receive emails about the completion of the execution of their  
160 archives. This feature is valuable for long simulations.

161 Once simulations complete, users can download and  
162 visualize their results. Simulation results can be downloaded  
163 in HDF5 format. The GUI provides users a simple form  
164 (Figure 2c) for designing two-dimensional plots of model  
165 predictions (Figure 2d, e).

166 Users also have the option to upload Vega visualizations  
167 (26) to visualize simulation results. This enables investi-  
168 gators to visualize their simulation results with a broad  
169 range of charts, as well as custom, interactive, publica-  
170 tion-quality diagrams. This also makes it easier to reuse  
171 visualizations across multiple simulation conditions by re-  
172 painting them with results of alternative simulations. Together,  
173 this combination of runBioSimulations and Vega ensures that  
174 the provenance of simulation results and visualizations of  
175 simulation results are transparent by capturing all of the  
176 information needed to reproduce each result and visualization,  
177 including the model, simulation, and simulator which  
178 generated each result and the transformations used to map  
179 each result to each diagram.

180 To help users debug simulations, the GUI also displays  
181 structured logs of their execution (Figure 2f). This can help  
182 direct users to errors in specific SED-ML tasks and outputs.

183 runBioSimulations also makes it easy for users to share  
184 simulations and their results via persistent URLs similar  
185 to file sharing services such as Google Drive. These links  
186 enable users to revisit their simulation results, share simu-  
187 lations with collaborators, anonymously share simulations with  
188 peer reviewers, and publish simulations by embedding links  
189 into articles. runBioSimulations is particularly well-suited  
190 to sharing computationally-expensive simulations because it  
191 enables investigators to quickly retrieve their results without  
192 having to wait for long simulations to complete.

193 Furthermore, developers can use runBioSimulations' REST  
194 API to build additional client applications that leverage run-  
195 BioSimulations' simulation logic. For example, developers  
196 could use the API to build additional clients for executing  
197 simulations such as Jupyter notebooks or desktop applications.

## 198 METHODS

199 runBioSimulations is composed of a GUI for submitting simu-  
200 lations, managing simulations, and visualizing their results;  
201 services for executing simulations on a high-performance  
202 computing (HPC) cluster, monitoring their progress, and  
203 collecting their results; and a database for storing simu-  
204 lations and their results (Figure 3). More information about  
205 the design, implementation, and deployment of runBioSimu-  
206 lations is available in the [Supplementary Data](#).

## 207 USE CASES

### 208 Publishing simulations

209 We believe that runBioSimulations' standards-driven design  
210 and unique capability to execute a broad range of simulations  
211 is ideal for publishing simulations. As more tools embrace  
212 SED-ML, runBioSimulations will help authors publish simu-  
213 lations that other investigators can easily reuse. For exam-  
214 ple, investigators could use runBioSimulations to explore

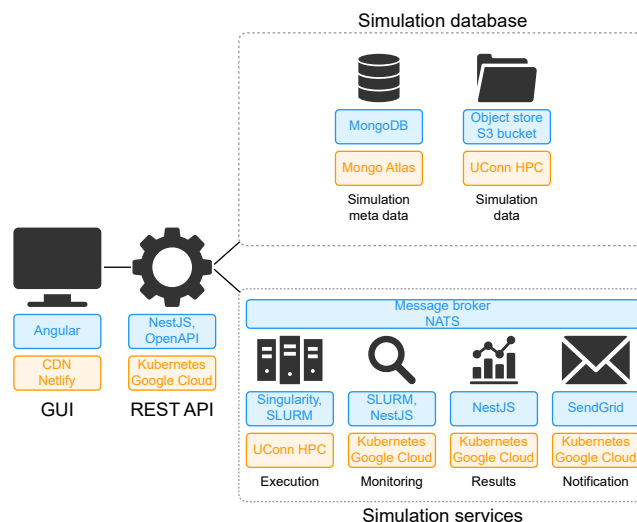

**Figure 3. Overview of the implementation (blue) and deployment (orange) of runBioSimulations.** The application consists of a GUI; services for executing, monitoring, and logging simulations; and a database of simulations and their results which interact via a REST API. To support multiple simultaneous users, runBioSimulations is deployed using the cloud and HPC.

215 additional conditions and predictions of a model beyond those  
216 reported by its authors. Furthermore, by providing simple  
217 access to multiple simulators, runBioSimulations can help  
218 authors and model curators verify that simulation results are  
219 reproducible across simulation algorithms and simulators.

## 220 Collaboration and peer review

221 We believe that runBioSimulations is similarly well-suited  
222 for sharing simulations with collaborators and reviewers. By  
223 helping investigators work with different frameworks and  
224 algorithms, runBioSimulations makes it easier for investiga-  
225 tors to contribute to multiple collaborations. In particular,  
226 runBioSimulations' simulation URLs make it easy for investi-  
227 gators to share simulations with collaborators, and they enable  
228 peer reviewers to access simulations anonymously.

## 229 Comparing simulation tools

230 Because runBioSimulations can execute the same simu-  
231 lations with multiple simulation tools, runBioSimulations is  
232 also well-suited to assessing the compatibility between tools.  
233 For example, investigators could compare results of the same  
234 simulations generated with multiple tools to evaluate the  
235 performance of the tools, identify inconsistencies among the  
236 tools, or detect potential errors in the tools.

## 237 Multiscale modeling education

238 Furthermore, we believe that runBioSimulations could be a  
239 valuable educational tool. In particular, instructors who use  
240 runBioSimulations for assignments involving multiple frame-  
241 works would only need to teach their students a single tool.  
242 Instructors could also leverage runBioSimulations' simula-  
243 tion results storage for assignments involving the analysis of  
244 results of computationally-expensive simulations.

## 245 DISCUSSION

246 In summary, runBioSimulations provides a simple GUI  
247 for executing a broad range of simulations described  
248 using community resources such as SBML and SED-ML.  
249 Importantly, the community can extend these simulation capa-  
250 bilities by contributing additional standardized simulation  
251 tools to the BioSimulators registry. The runBioSimulations  
252 GUI also provides users features for managing their simula-  
253 tions, interactively visualizing their results, and sharing their  
254 simulations through persistent URLs. In addition, developers  
255 can use runBioSimulations' API to build custom applications  
256 for executing simulations and/or analyzing simulation results.  
257 Together, we believe runBioSimulations will both help authors  
258 of in silico experiments share their simulations and help other  
259 investigators reproduce and reuse their studies. Ultimately,  
260 we believe runBioSimulations will facilitate collaboration and  
261 foster more comprehensive and more predictive models.

### 262 Additional modeling formalisms, algorithms, and formats

263 We invite developers to extend runBioSimulations to more  
264 simulations by contributing additional standardized simula-  
265 tion tools to BioSimulators. To help developers standardize  
266 their tools, BioSimulators provides a Python library for  
267 executing COMBINE archives, a test suite for validating  
268 simulation tools, several examples, and documentation.

### 269 More sophisticated data visualizations

270 We also aim to expand the visualization features of run-  
271 BioSimulations by using Vega to support a broad range of  
272 canonical chart types, as well as custom charts, such as  
273 network maps. By capturing how charts can be painted with  
274 data, Vega would also enable users to reuse diagrams with  
275 multiple models and simulations, furthering our goals of reuse  
276 and collaboration.

### 277 Online platform for sharing entire simulation projects

278 Furthermore, we plan to use the runBioSimulations API to  
279 develop an online platform that will help authors create and  
280 publish entire simulation studies and provide the community  
281 a central place to discover and reuse studies. This platform  
282 will layer several additional capabilities on top of runBioSim-  
283 ulations. The platform will enable authors to publish models,  
284 simulations, simulation results, and data visualizations of sim-  
285 ulation results. The platform will also help the community  
286 create and execute variants of published models and simu-  
287 lations to explore alternative simulation conditions, as well  
288 as help the community reuse published data visualizations to  
289 examine their results. We anticipate this platform will further  
290 bolster model reuse, composition, and collaboration.

### 291 Additional modeling and simulation tools

292 Finally, we aim to help the community use runBioSimula-  
293 tions' API to develop additional tools. For example, model  
294 repositories could use runBioSimulations to provide capabili-  
295 ties for executing their models, and model format developers  
296 could use runBioSimulations to implement test suites for  
297 verifying that simulators correctly support their formats.

## 298 AVAILABILITY

299 The application and API are freely available without regis-  
300 tration at <https://run.biosimulations.org> along with a tutorial,  
301 examples, and documentation. The source code is openly  
302 available under the MIT license at [https://github.com/biosim-  
303 ulations/Biosimulations](https://github.com/biosimulations/Biosimulations).

## 304 ACKNOWLEDGEMENTS

305 We thank Arthur Goldberg, Herbert Sauro, James Schaff,  
306 Lucian Smith, and the Center for Reproducible Biomedical  
307 Modeling for input and feedback.

## 308 FUNDING

309 This work was supported by National Institutes of Health  
310 award P41EB023912.

## 311 Conflict of interest statement.

312 None declared.

## 313 REFERENCES

- 314 1. Karr, J. R., Sanghvi, J. C., Macklin, D. N., Gutschow, M. V., Jacobs, J. M.,  
315 Bolival Jr, B., Assad-Garcia, N., Glass, J. I. and Covert, M. W. (2012) A  
316 whole-cell computational model predicts phenotype from genotype. *Cell*,  
317 **150**, 389–401.
- 318 2. Szigeti, B., Roth, Y. D., Sekar, J. A., Goldberg, A. P., Pochiraju, S. C. and  
319 Karr, J. R. (2018) A blueprint for human whole-cell modeling. *Curr.*  
320 *Opin. Syst. Biol.*, **7**, 8–15.
- 321 3. Faeder, J. R., Blinov, M. L. and Hlavacek, W. S. (2009) Rule-based  
322 modeling of biochemical systems with BioNetGen. In *Systems Biology*  
323 pp. 113–167 Springer.
- 324 4. Clerx, M., Cooling, M. T., Cooper, J., Garny, A., Moyle, K.,  
325 Nickerson, D. P., Nielsen, P. M. and Sorby, H. (2020) CellML 2.0. *J.*  
326 *Integr. Bioinform.*, **17**, 20200021.
- 327 5. Gleeson, P., Crook, S., Cannon, R. C., Hines, M. L., Billings, G. O.,  
328 Farinella, M., Morse, T. M., Davison, A. P., Ray, S., Bhalla, U. S. et al.  
329 (2010) NeuroML: a language for describing data driven models of  
330 neurons and networks with a high degree of biological detail. *PLoS*  
331 *Comput. Biol.*, **6**, e1000815.
- 332 6. Keating, S. M., Waltemath, D., König, M., Zhang, F., Dräger, A.,  
333 Chaouiya, C., Bergmann, F. T., Finney, A., Gillespie, C. S., Helikar, T.  
334 et al. (2020) SBML Level 3: an extensible format for the exchange and  
335 reuse of biological models. *Mol. Syst. Biol.*, **16**, e9110.
- 336 7. Olivier, B. G. and Bergmann, F. T. (2018) SBML level 3 package: flux  
337 balance constraints version 2. *J. Integr. Bioinform.*, **15**, 20170082.
- 338 8. Chaouiya, C., Bérenguier, D., Keating, S. M., Naldi, A., Van Iersel, M. P.,  
339 Rodriguez, N., Dräger, A., Büchel, F., Cokelaer, T., Kowal, B. et al.  
340 (2013) SBML qualitative models: a model representation format  
341 and infrastructure to foster interactions between qualitative modelling  
342 formalisms and tools. *BMC Syst. Biol.*, **7**, 1–15.
- 343 9. Harris, L. A., Hogg, J. S., Tapia, J.-J., Sekar, J. A., Gupta, S., Korsunsky, I.,  
344 Arora, A., Barua, D., Sheehan, R. P. and Faeder, J. R. (2016) BioNetGen  
345 2.2: advances in rule-based modeling. *Bioinformatics*, **32**, 3366–3368.
- 346 10. Sneddon, M. W., Faeder, J. R. and Emonet, T. (2011) Efficient modeling,  
347 simulation and coarse-graining of biological complexity with NFsim.  
348 *Nat. Methods*, **8**, 177–183.
- 349 11. Moraru, I. I., Schaff, J. C., Slepchenko, B. M., Blinov, M., Morgan, F.,  
350 Lakshminarayana, A., Gao, F., Li, Y. and Loew, L. M. (2008) Virtual Cell  
351 modelling and simulation software environment. *IET Syst. Biol.*, **2**,  
352 352–362.
- 353 12. Müssel, C., Hopfensitz, M. and Kestler, H. A. (2010) BoolNet—an R  
354 package for generation, reconstruction and analysis of Boolean networks.  
355 *Bioinformatics*, **26**, 1378–1380.
- 356 13. Helikar, T., Kowal, B. and Rogers, J. (2013) A cell simulator platform: The  
357 Cell Collective. *Clin. Pharmacol. Ther.*, **93**, 393–395.

- 358 14. Olivier,B. G., Swat,M. J. and Moné,M. J. (2016) Modeling and simulation tools: from systems biology to systems medicine. *Syst. Med.*, pp. 441–463.
- 359  
360
- 361 15. Ebrahim,A., Lerman,J. A., Palsson,B. O. and Hyduke,D. R. (2013) COBRApy: constraints-based reconstruction and analysis for Python. *BMC Syst. Biol.*, **7**, 1–6.
- 362  
363
- 364 16. Bergmann,F. T., Hoops,S., Klahn,B., Kummer,U., Mendes,P., Pahle,J. and Sahle,S. (2017) COPASI and its applications in biotechnology. *J. Biotechnol.*, **261**, 215–220.
- 365  
366
- 367 17. Peters,M., Eicher,J. J., van Niekerk,D. D., Waltemath,D. and Snoep,J. L. (2017) The JWS Online simulation database. *Bioinformatics*, **33**, 1589–1590.
- 368  
369
- 370 18. Drawert,B., Hellander,A., Bales,B., Banerjee,D., Bellesia,G., Daigle Jr,B. J., Douglas,G., Gu,M., Gupta,A., Hellander,S. et al. (2016) Stochastic simulation service: bridging the gap between the computational expert and the biologist. *PLoS Comput. Biol.*, **12**, e1005220.
- 371  
372  
373  
374
- 375 19. Choi,K., Medley,J. K., König,M., Stocking,K., Smith,L. P., Gu,S. and Sauro,H. M. (2018) tellurium: an extensible python-based modeling environment for systems and synthetic biology. *Biosystems*, **171**, 74–79.
- 376  
377
- 378 20. Garny,A. and Hunter,P. J. (2015) OpenCOR: a modular and interoperable approach to computational biology. *Front. Physiol.*, **6**, 26.
- 379
- 380 21. Gleeson,P., Cantarelli,M., Marin,B., Quintana,A., Earnshaw,M., Sadeh,S., Piasini,E., Birgiolas,J., Cannon,R. C., Cayco-Gajic,N. A. et al. (2019) Open Source Brain: a collaborative resource for visualizing, analyzing, simulating, and developing standardized models of neurons and circuits. *Neuron*, **103**, 395–411.
- 381  
382  
383  
384
- 385 22. Bergmann,F. T., Cooper,J., König,M., Moraru,I., Nickerson,D., Le Novère,N., Olivier,B. G., Sahle,S., Smith,L. and Waltemath,D. (2018) Simulation experiment description markup language (SED-ML) level 1 version 3 (L1V3). *J. Integr. Bioinform.*, **15**.
- 386  
387  
388
- 389 23. Bergmann,F. T., Adams,R., Moodie,S., Cooper,J., Glont,M., Golebiewski,M., Hucka,M., Laibe,C., Miller,A. K., Nickerson,D. P. et al. (2014) COMBINE archive and OMEX format: one file to share all information to reproduce a modeling project. *BMC Bioinformatics*, **15**, 1–9.
- 390  
391  
392  
393
- 394 24. Malik-Sheriff,R. S., Glont,M., Nguyen,T. V., Tiwari,K., Roberts,M. G., Xavier,A., Vu,M. T., Men,J., Maire,M., Kananathan,S. et al. (2020) BioModels—15 years of sharing computational models in life science. *Nucleic Acids Res.*, **48**, D407–D415.
- 395  
396  
397
- 398 25. Scharm,M., Wendland,F., Peters,M., Wolfien,M., Theile,T. and Waltemath,D., The CombineArchiveWeb application—A web based tool to handle files associated with modelling results. Technical report, PeerJ PrePrints (2014).
- 399  
400  
401
- 402 26. Satyanarayan,A., Wongsuphasawat,K. and Heer,J. (2014) Declarative interaction design for data visualization. In *Proc. 27th Annu. ACM Symp. User Interface Soft. Technol.* pp. 669–678.
- 403  
404
